# Supplementary material
Source: publisher site journal article supplement (https://www.degruyterbrill.com/publication/journal_key/JCCALL/downloadAsset/JCCALL_CFP%202025%2021st%20ChinaCALL%20Conference.pdf)
Supplement: Supplementary file 1 [file JCCALL_CFP%202025%2021st%20ChinaCALL%20Conference.pdf]

# 2025 (21st) ChinaCALL Conference

## 2nd Call for Papers

September 19-21, 2025      Nanjing, China

Hosted by Computer-Assisted Language Learning Association, China Association for Comparative Studies of English and Chinese (ChinaCALL), organized by Institute of Online Education, Artificial Intelligence and Human Languages Lab, at Beijing Foreign Studies University (BFSU), and College of Foreign Languages at Nanjing University of Aeronautics and Astronautics (NUAA), and cohosted by *Journal of China Computer-Assisted Language Learning* (JCCALL), Online Confucius Institute at The Open University, Virtual Exchange (VE) China Hub, and Beijing Waiyan Online Digital Technology Co., Ltd., the 2025 (21st) ChinaCALL Conference (ChinaCALL 2025) will be held in Nanjing, China, from September 19th to 21st, 2025.

Themed around “Innovating CALL, Innovating Pedagogy”, the conference aims to share knowledge, skills, and ideas on the integration of technologies and language learning in the forms of pre-conference workshops, keynote speeches, symposia, individual presentations and colloquia.

**We welcome experts, teachers, and practitioners in CALL to join us!**

### Keynote speakers

1. **Dr. Phil HUBBARD**  
Stanford University

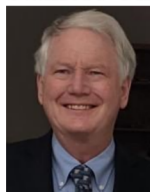

Navigating theory and theories in computer-assisted language learning

2. **Prof. CHEN Xinren**  
Nanjing University

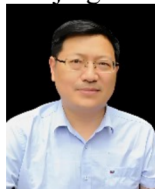

Generated by human authors and LLMs: metapragmatic explorations and pedagogical implications

3. **Prof. Glenn STOCKWELL**  
Waseda University

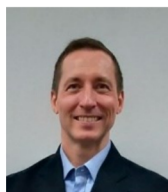

Finding our own way: self-directed professional development in language teaching with artificial intelligence

4. **Prof. GU Mingyue**  
The Education University of Hong Kong

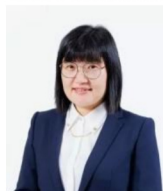

Youth in the digital multiverse: translanguaging, identity, and the pursuit of well-being

5. **Prof. Klaus-Dieter ROSSADE**  
The Open University

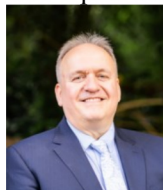

Assessment futures – creating quality and fit for purpose assessment for all

6. **Prof. XIAO Junhong**  
Editor of *SpringerBriefs in Open and Distance Education*

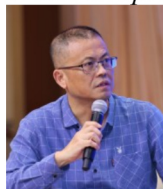

Critiquing CALL publications from a research design perspective

7. **Prof. LI Zuowen**  
Beijing Foreign Studies University

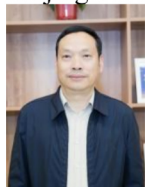

Digital virtual teachers and new quality classroom teaching

8. **Prof. FAN Xiangtao**  
Nanjing University of Aeronautics and Astronautics

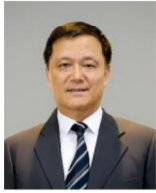

Human translator: challenges and opportunities in the AI era

## Pre-conference speakers

1. **Prof. GU Yueguo**

Beijing Foreign Studies University / President of ChinaCALL / Editor-in-chief of JCCALL

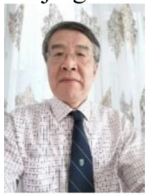

Workshop on exploring older people's lifelong learning, and learning foreign languages in particular

2. **Dr. ZHANG Shuai**

Beijing Foreign Studies University

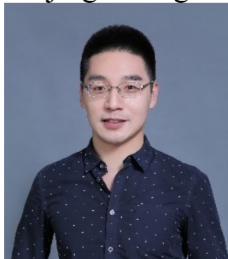

Exploring Chinese EFL teachers' perceptions of digital/mobile technologies in higher education: A focus on equality, diversity, and inclusiveness

3. **Dr. WANG Qi**

Beijing Foreign Studies University

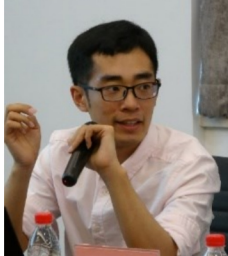

Exploring in-service teachers' interaction patterns in online learning community

## Invited speakers

1. **Prof. LI Liwen**

Beijing Foreign Studies University

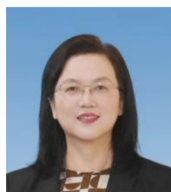

Expansive learning in EFL digital storytelling

2. **Dr. KAN Qian**  
The Open University

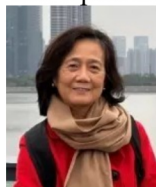

- Prof. TANG Jinlan**  
Beijing Foreign Studies University

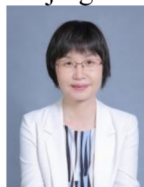

Introduction to Virtual Exchange and its benefits: a case study of a teaching training programme

3. **Prof. Mirjam HAUCK**  
The Open University / President of EUROCALL

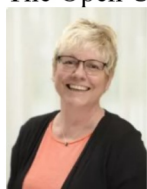

Critical virtual exchange: at the interface of critical CALL, critical digital literacy, and critical global citizenship education

4. **Ms. Regina C. BRAUTLACHT**  
Hochschule Bonn-Rhein-Sieg University  
of Applied Sciences (H-BRS)

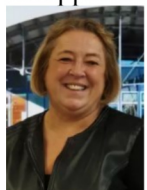

- Dr. CHEN Hao**  
Shenzhen Technology University

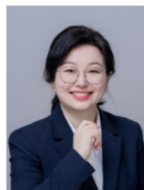

From CALL to multidisciplinary virtual exchange: enhancing collaboration, diversity, and global skills

## Conference theme

### Innovating CALL, Innovating Pedagogy

We invite participants to present their current or recent research and to focus hereby on one or more of the following topics.

1. **CALL research**
2. **Emerging technologies & language education**
3. **Web-based language teaching, learning & assessment**
4. **CALL materials & CALL environment**

5. CALL & teacher education
6. CALL in vocational education
7. Foreign language teaching and research
8. English language education
9. Applied linguistics
10. Translation studies
11. Studies of English for Specific Purposes

**Best Presentation Award** will be awarded to up to two participants. High quality research papers in English will be recommended to be published on *Journal of China Computer-Assisted Language Learning (JCCALL)*, the official journal of ChinaCALL. All published papers are freely accessible on the journal's homepage: [www.degruyter.com/JCCALL](http://www.degruyter.com/JCCALL)

Selected research papers in English will also be suggested to other journals, including *International Journal of Computer-Assisted Language Learning and Teaching (IJCALLT)* and *Chinese Journal of Applied Linguistics*. Besides, we also plan to publish online a conference proceeding of accepted papers.

### Important dates

|                       |                                                                         |
|-----------------------|-------------------------------------------------------------------------|
| From December 1, 2024 | Opening of regular registration & proposal submission                   |
| <b>June 30, 2025</b>  | <b>Deadline for proposal submission</b>                                 |
| From July 1, 2025     | Notices of acceptance sent out                                          |
| <b>July 31, 2025</b>  | <b>Deadline for regular registration &amp; payment</b>                  |
| August 15, 2025       | Release of conference program &<br>Deadline for short papers submission |
| September 19-21, 2025 | Plenary & concurrent sessions                                           |

### Conference information

1. Please click "[Registration](#)" on the conference website to register and submit abstracts ONLINE.
2. **Working languages:** English
3. **Conference sessions:** The conference will be composed of pre-conference workshops (60min per session), keynote speeches (60min per session), symposia (90min for 3-4 speakers per session), individual presentations (25min per session).
4. **Registration fee & payment:** The registration fee is RMB¥1200 or USD\$165 each for the regular participant, and RMB¥800 or USD\$110 each for full-time postgraduate student. Please kindly note that student participants need to present their student IDs upon registration. The registration fee includes the cost of conference organization and the conference information package. Once paid, it will not be refunded. The registration fee has to be prepaid ***before July 31, 2025***. Please kindly note that regular participants who fail to pay by due date will not be arranged to give



presentations. On-site payment will only be available for listeners who decide to come on short notice.

\*For international participants, please pay the registration fee to:

Account Name: 南京航空航天大学 (Nanjing University of Aeronautics and Astronautics)

Bank Name: 交通银行南京分行御道街支行 (Bank Of Communications NanJing Branch, YU DAO JIE Branch)

Account No: 320006639010149000354

SWIFT CODE: COMMCNSH-NJG

\*Please note: Full name + ChinaCALL + email address/phone number

5. **Accommodation:** The hotel information will be released on the conference website in due course. Please kindly note that the conference organizing committee is NOT responsible for hotel reservation, and the hotel expenses are NOT included in the registration fee.

## Abstract submission guideline

1. Please click “**Registration**” on the conference website to register and submit abstracts ONLINE. **Abstracts submitted should present new and unpublished research.**
2. **Deadline of submission:** Abstract must be submitted online ***before June 30, 2025***. Each leading author (first author) can submit up to 2 abstracts.
3. **The Body of Abstract:** Maximum word count is 300. (Title, authors, affiliations and references are not included in word limit.) The abstract should be composed of research background, objectives, methods and outcomes. Please include the grant or other support information for your research, if appropriate.
4. After abstracts are accepted, please send short papers (about 3000 words) to [conference@beiwaionline.com](mailto:conference@beiwaionline.com) before August 15, 2025.

## Contact us

Website: [www.chinacall.org.cn/conference2025](http://www.chinacall.org.cn/conference2025)

E-mail: [conference@beiwaionline.com](mailto:conference@beiwaionline.com)

Tel: (86) 010-88818307

Conference Organizing Committee  
March 2025
